# Supplementary material
Source: PubMed Central journal article supplement (PMC10291399)
Supplement: sj-pdf-1-gam-10.1177_27536130231185072.pdf [file sj-pdf-1-gam-10.1177_27536130231185072.pdf]

# Appendix A: Sample of Survey Items

Assessing Psychological Resilience of Health Profession Graduate Students During the COVID-19 Pandemic

---

Q1 – Description of study and consent to participate

Q2- Q8 Demographic data

Q9 Which of the following experiences have you had? (select all that apply)

- I have been tested for COVID-19 (1)
  - I have tested positive for COVID-19 (2)
  - I have had to quarantine because of actual/suspected exposure to COVID-19 (3)
  - I have had close contact (Interacted with face-face for more than 15 min) with someone who then tested positive for COVID-19 (4)
  - I have had a family member or close friends who have tested positive for COVID-19 (5)
  - I have had a close friend or family member who required hospitalization for COVID-19 (6)
  - I have had a close friend or family member die from COVID-19 (7)
  - I have worked face to face with patients who were actively positive for COVID-19 (8)
  - I have worked face to face with patients who had previously tested positive for COVID-19 (9)
  - I have worked with patients who have since died of COVID-19 or are likely to die of COVID-19 (10)
-

Q10 During the COVID-19 Pandemic, which of the following have you felt? (select all that apply).

- Pride in myself for contributing on the "front lines" (1)
- Excited about increased clinical opportunities/ responsibilities available to me because of COVID-19 (2)
- Guilt about "not contributing enough" (3)
- Fearful of contracting COVID-19 (4)
- Fearful of infecting family/ loved ones (5)
- Lonely/ isolated (6)
- Burned out (7)
- Forced/ pressured to go into a dangerous situation related to COVID-19 as part of my health professional program (8)
- Resentful toward my training program (9)
- Frustrated by all the restrictions/ changes (10)

Q11 How do you rate the support you've felt from **The University of Florida as an institution** during the COVID-19 pandemic?

- Very Satisfied (1)
- Moderately Satisfied (2)
- Slightly Satisfied (3)
- Neutral (4)
- Slightly Dissatisfied (5)
- Moderately Dissatisfied (6)
- Very Dissatisfied (7)

---

Q12 How do you rate the support you've felt from **your specific professional training program** during the COVID-19 pandemic?

- Very Satisfied (1)
- Moderately Satisfied (2)
- Slightly Satisfied (3)
- Neutral (4)
- Slightly Dissatisfied (5)
- Moderately Dissatisfied (6)
- Very Dissatisfied (7)

---

Q13 How satisfied are you with the accessibility of COVID-19 testing at UF?

- Very Satisfied (1)
  - Moderately satisfied (2)
  - Slightly satisfied (3)
  - Neutral (4)
  - Slightly dissatisfied (5)
  - Moderately dissatisfied (6)
  - Very dissatisfied (7)
-

Q14 How satisfied are you with accessing and using COVID-19 related PPE while at UF?

- Very Satisfied (1)
  - Moderately satisfied (2)
  - Slightly satisfied (3)
  - Neutral (4)
  - Slightly dissatisfied (5)
  - Moderately dissatisfied (6)
  - Very dissatisfied (7)
- 

Q15 How much has the format of your lecture- based or didactic educational experiences changed during the COVID-19 Pandemic?

- Significant positive change (1)
  - Moderate positive change (2)
  - Minimal positive change (3)
  - No change (4)
  - Minimal negative change (5)
  - Moderate negative change (6)
  - Significant negative change (7)
  - N/A (8)
-

Q16 How much has the format of your clinical/ patient-centered educational experiences changed during the COVID-19 Pandemic?

- Significant positive change (1)
  - Moderate positive change (2)
  - Minimal positive change (3)
  - No change (4)
  - Minimal negative change (5)
  - Moderate negative change (6)
  - Significant negative change (7)
  - N/A (8)
- 

Q17 Taken as a whole, how do you feel the COVID-19 Pandemic has affected your education and training?

- Very Positive Impact (1)
  - Moderately Positive Impact (2)
  - Slightly Positive Impact (3)
  - Neutral Impact (4)
  - Slightly Negative Impact (5)
  - Moderately Negative Impact (6)
  - Very Negative Impact (7)
-

Q18 How satisfied are you with your current level of in person contact (classroom lectures, patient/ research participant contact, rotations, lab activities, hands on training, etc.)?

- Very Satisfied (1)
  - Moderately Satisfied (2)
  - Slightly Satisfied (3)
  - Neutral (4)
  - Slightly Dissatisfied (5)
  - Moderately Dissatisfied (6)
  - Very Dissatisfied (7)
- 

Q19 How have your personal experiences during the COVID-19 pandemic affected your decision to pursue a career in healthcare?

- Strongly Reinforced (1)
  - Moderately Reinforced (2)
  - Slightly Reinforced (3)
  - No effect (4)
  - Slightly Weakened (5)
  - Moderately Weakened (6)
  - Strongly Weakened (7)
-

Q20 How has the COVID-19 pandemic impacted the educational opportunities available to you?

- Significantly more opportunities (1)
  - Somewhat more opportunities (2)
  - Slightly more opportunities (3)
  - No change in opportunities (4)
  - Slightly fewer opportunities (5)
  - Somewhat fewer opportunities (6)
  - Significantly fewer opportunities (7)
- 

Q21 How has COVID-19 impacted how you view the faculty in your program?

- Very Positive Change (1)
  - Moderately Positive Change (2)
  - Slightly Positive Change (3)
  - Neutral/ No Change (4)
  - Slightly Negative Change (5)
  - Moderately Negative Change (6)
  - Very Negative Change (7)
-

Q22 How has COVID-19 impacted your overall wellbeing?

- Very Positive Change (1)
  - Moderately Positive Change (2)
  - Slightly Positive Change (3)
  - Neutral/ No change (4)
  - Slightly Negative Change (5)
  - Moderately Negative Change (6)
  - Very Negative Change (7)
- 

Q23 What is your current level of stress?

- Extreme (1)
  - Very high (2)
  - Somewhat high (3)
  - Moderate (4)
  - Somewhat low (5)
  - Very low (6)
  - None (7)
-



Q24 Which of the following best describes you?

- I enjoy my work (school). I have no symptoms of burnout (1)
  - Occasionally I am under stress and I don't always have as much energy as I once did, but I don't feel burned out. (2)
  - I am definitely burning out and have one or more symptoms of burnout, such as physical and emotional exhaustion. (3)
  - The symptoms of burnout that I'm experiencing won't go away. I think about frustrations at work (school) a lot. (4)
  - I feel completely burned out and often wonder if I can go on. I am at the point where I may need some changes or many need to seek some sort of help. (5)
- 

Q25 How concerned have COVID-19 made you about your ability to graduate "on time"?

- Not concerned at all (1)
  - Slightly concerned (2)
  - Moderately concerned (3)
  - Very concerned (4)
-

Q26 How often did you utilize the following strategies to cope with stress **before the COVID-19 pandemic?**

|                                                               | Never (1)             | Rarely (2)            | Somewhat (3)          | Often (4)             | Always (5)            |
|---------------------------------------------------------------|-----------------------|-----------------------|-----------------------|-----------------------|-----------------------|
| Drinking Alcohol (1)                                          | <input type="radio"/> |
| Drug Use (2)                                                  | <input type="radio"/> |
| Eating (3)                                                    | <input type="radio"/> |
| Hobbies (4)                                                   | <input type="radio"/> |
| Journaling (5)                                                | <input type="radio"/> |
| Mediation/<br>Mindfulness (6)                                 | <input type="radio"/> |
| Outdoor Activities (7)                                        | <input type="radio"/> |
| Physical Activity/<br>Exercise (8)                            | <input type="radio"/> |
| Reading (9)                                                   | <input type="radio"/> |
| Sex/<br>Masturbation (10)                                     | <input type="radio"/> |
| Social Interactions<br>with Family/<br>Friends in Person (11) | <input type="radio"/> |
| Social Interactions<br>with Family/<br>Friends Virtually (12) | <input type="radio"/> |
| Social Media (13)                                             | <input type="radio"/> |

Spiritual or  
Religious  
Practices (14)

TV/ Movies  
(15)

Video Games  
(16)

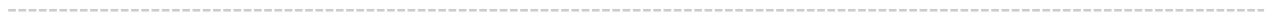

Q27 How often have you utilized the following strategies to cope with stress **during the COVID-19 pandemic?**

|                                                                 | Never (1)             | Rarely (2)            | Somewhat (3)          | Often (4)             | Always (5)            |
|-----------------------------------------------------------------|-----------------------|-----------------------|-----------------------|-----------------------|-----------------------|
| Drinking Alcohol (1)                                            | <input type="radio"/> |
| Drug use (2)                                                    | <input type="radio"/> |
| Eating (3)                                                      | <input type="radio"/> |
| Hobbies (4)                                                     | <input type="radio"/> |
| Journaling (5)                                                  | <input type="radio"/> |
| Meditation/<br>Mindfulness (6)                                  | <input type="radio"/> |
| Outdoor Activities (7)                                          | <input type="radio"/> |
| Physical Activity/<br>Exercise (8)                              | <input type="radio"/> |
| Reading (9)                                                     | <input type="radio"/> |
| Sex/<br>Masturbation (10)                                       | <input type="radio"/> |
| Social Interaction<br>with Family/<br>Friends in<br>Person (11) | <input type="radio"/> |
| Social Interaction<br>with Family/<br>Friends<br>Virtually (12) | <input type="radio"/> |
| Social Media (13)                                               | <input type="radio"/> |

|                                       |                       |                       |                       |                       |                       |
|---------------------------------------|-----------------------|-----------------------|-----------------------|-----------------------|-----------------------|
| Spiritual or Religious Practices (14) | <input type="radio"/> |
| TV/Movies (15)                        | <input type="radio"/> |
| Video Games (16)                      | <input type="radio"/> |

---

Q28 How has COVID affected the quantity/ quality of your social interactions with your friends & family?

- Very Positive Change (1)
  - Moderately Positive Change (2)
  - Slightly Positive Change (3)
  - Neutral/ No Change (4)
  - Slightly Negative Change (5)
  - Moderately Negative Change (6)
  - Very Negative Change (7)
-

Q29 How has COVID affected your sleep?

- Very Positive Change (1)
  - Moderately Positive Change (2)
  - Slightly Positive Change (3)
  - Neutral/ No change (4)
  - Slightly Negative Change (5)
  - Moderately Negative Change (6)
  - Very Negative Change (7)
- 

Q30 How has COVID affected your physical activity?

- Very Positive Change (1)
  - Moderately Positive Change (2)
  - Slightly Positive Change (3)
  - Neutral/ No Change (4)
  - Slightly Negative Change (5)
  - Moderately Negative Change (6)
  - Very Negative Change (7)
-

Q31 How has COVID affected your ability to pursue your hobbies?

- Very Positive Change (1)
  - Moderately Positive Change (2)
  - Slightly Positive Change (3)
  - Neutral/ No Change (4)
  - Slightly Negative Change (5)
  - Moderately Negative Change (6)
  - Very Negative Change (7)
- 

Q32 How has COVID affected the way you conceptualize/ view society?

- Very Positive Change (1)
  - Moderately Positive Change (2)
  - Slightly Positive Change (3)
  - Neutral/ No Change (4)
  - Slightly Negative Change (5)
  - Moderately Negative Change (6)
  - Very Negative Change (7)
-

Q33 How has COVID affected the way you conceptualize/ view yourself?

- Very Positive Change (1)
- Moderately Positive Change (2)
- Slightly Positive Change (3)
- Neutral/ No Change (4)
- Slightly Negative Change (5)
- Moderately Negative Change (6)
- Very Negative Change (7)

Q34- 44 **10-Item Connor-Davidson Resilience Scale (Copyrighted, used with permission)**

Q45 Please list any other comments you would like to share about your experiences as a health profession student during the COVID-19 pandemic.

---

---

---

---

---

Q46 If you are struggling emotionally and/or are concerned about your ability to cope, please reach out to the following resources for support: o UF Crisis line: 352-392-1575 or U Matter We Care: <https://umatter.ufl.edu/> o UF Counseling and Wellness Center: <https://counseling.ufl.edu/> o Alachua County Crisis Center: 352-264-6789 o National Suicide Prevention Lifeline: 1-800-273-TALK

---
